# Supplementary material for: Fabrication of 2D/2D Bi2MoO6/Sx@g-C3N(4−y) type-II heterojunction photocatalyst for enhanced visible-light-mediated degradation of tetracycline in wastewater
Source: Royal Society of Chemistry journal article supplement (doi:10.1039/d4dt02334j), 2024-12-17
Supplement: d4dt02334j1.pdf [file d4dt02334j1.pdf]

## Supplementary Information

Fabrication of 2D/2D  $\text{Bi}_2\text{MoO}_6/\text{S}_x@\text{g-C}_3\text{N}_{(4-y)}$  type-II heterojunction photocatalyst for enhanced visible-light-mediated degradation of tetracycline in wastewater

*Soorya K K*<sup>a</sup>, *Adarsh Singh*<sup>a</sup>, *Suneel Kumar Srivastava*<sup>b δ\*</sup>, *Animesh Bhattacharya*<sup>c</sup>, *Amit Bhatnagar*<sup>d</sup>, *Ashok Kumar Gupta*<sup>a \*</sup>

<sup>a</sup> Environmental Engineering Division, Department of Civil Engineering,  
Indian Institute of Technology Kharagpur, Kharagpur 721302, India

<sup>b</sup> Department of Chemistry,  
Indian Institute of Technology Kharagpur, Kharagpur 721302, India

<sup>c</sup> School of Environmental Science and Engineering,  
Indian Institute of Technology Kharagpur, Kharagpur 721302, India

<sup>d</sup> Department of Separation Science, LUT School of Engineering Science,  
LUT University, Sammonkatu 12, Mikkeli FI-50130, Finland

\* Corresponding author.

*E-mail address:* agupta@civil.iitkgp.ac.in (A. K. Gupta).

*E-mail address:* suneelchemkgp@gmail.com (δS. K. Srivastava, former faculty, IIT Kharagpur).

### **Section S1 Thermogravimetric analysis (TGA) of $BS_xN_y$ (II)**

About 1.47% weight loss is observed on heating  $BS_xN_y$  (II) in the temperature range of 30°-810 °C. Reportedly, pristine  $Bi_2MoO_6$  exhibited stability up to 800°C with minor weight loss.<sup>1</sup> In contrast, rapid decomposition is observed in the thermogram of g- $C_3N_4$  at around 600°C.<sup>2</sup> It is noted that the weight loss profile in the thermogram of  $BS_xN_y$  (II) can be divided into three stages. The first step (25-200°C) comprises the weight loss attributed to the expulsion of adsorbed water from the  $BS_xN_y$  (II). Subsequent weight loss in TGA occurs in the range of 200 °C - 500°C due to the initiation of S loss from  $S_x@g-C_3N_{(4-y)}$ .<sup>3</sup> The significant weight loss in the final step at around 600°C could possibly be due to the decomposition of  $S_x@g-C_3N_{(4-y)}$  in the heterojunction.

### **Section S2 Synthesis of pristine g- $C_3N_4$**

Pristine g- $C_3N_4$  was synthesized using a previously reported method.<sup>4</sup> In a typical synthesis procedure, 10 g of melamine was calcined in a muffle furnace at a temperature of 550°C for 4 h with a heating rate of 20°C/min. The resulting yellow product was then crushed into fine powder after cooling to ambient temperature.

### **Section S3 Effect of cations on photocatalytic degradation efficiency of tetracycline (TCL)**

The  $Fe^{3+}$  ions in the reaction mixture showcased an inhibitory effect on photocatalytic degradation of TCL, decreasing degradation efficiency to 84.7%. This can be due to the conversion of  $Fe^{3+}$  to  $Fe(OH)^{\dagger}_2$ , which tend to absorb a part of incident photons.<sup>5</sup> On the contrary, the complex formed due to the interaction between  $Ca^{2+}$  and TCL reportedly increases light absorption, as reflected by the negligible decrease in degradation efficiency.<sup>6,7</sup>

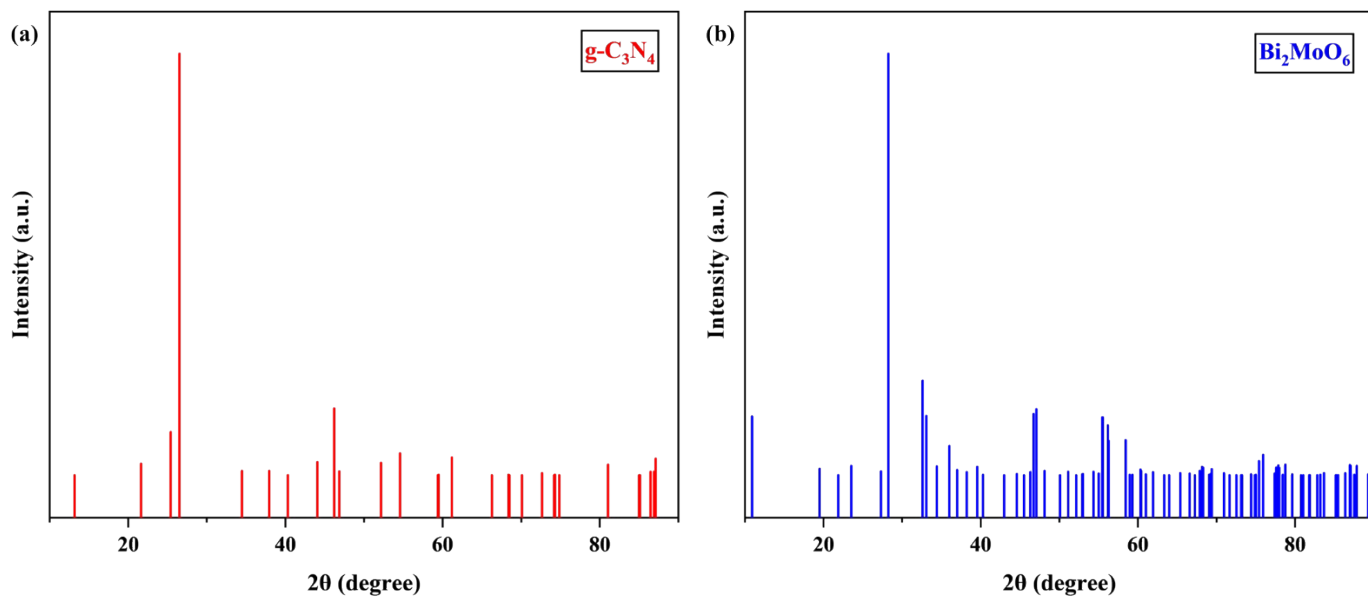

Fig. S1 XRD pattern of (a)  $g\text{-C}_3\text{N}_4$  (JCPDS card no. - 01-087-1526), (b)  $\text{Bi}_2\text{MoO}_6$  (JCPDS card no. - 01-076-2388) from standard atlas card for crystal planes.

| ISO 25178         |       |    |                         |
|-------------------|-------|----|-------------------------|
| Height Parameters |       |    |                         |
| Sq                | 1.02  | nm | Root mean square height |
| Ssk               | 1.35  |    | Skewness                |
| Sku               | 16.1  |    | Kurtosis                |
| Sp                | 18.3  | nm | Maximum peak height     |
| Sv                | 4.01  | nm | Maximum pit height      |
| Sz                | 22.3  | nm | Maximum height          |
| Sa                | 0.774 | nm | Arithmetic mean height  |

Fig. S2 Height parameters of  $BS_xN_y$  (II) composite.

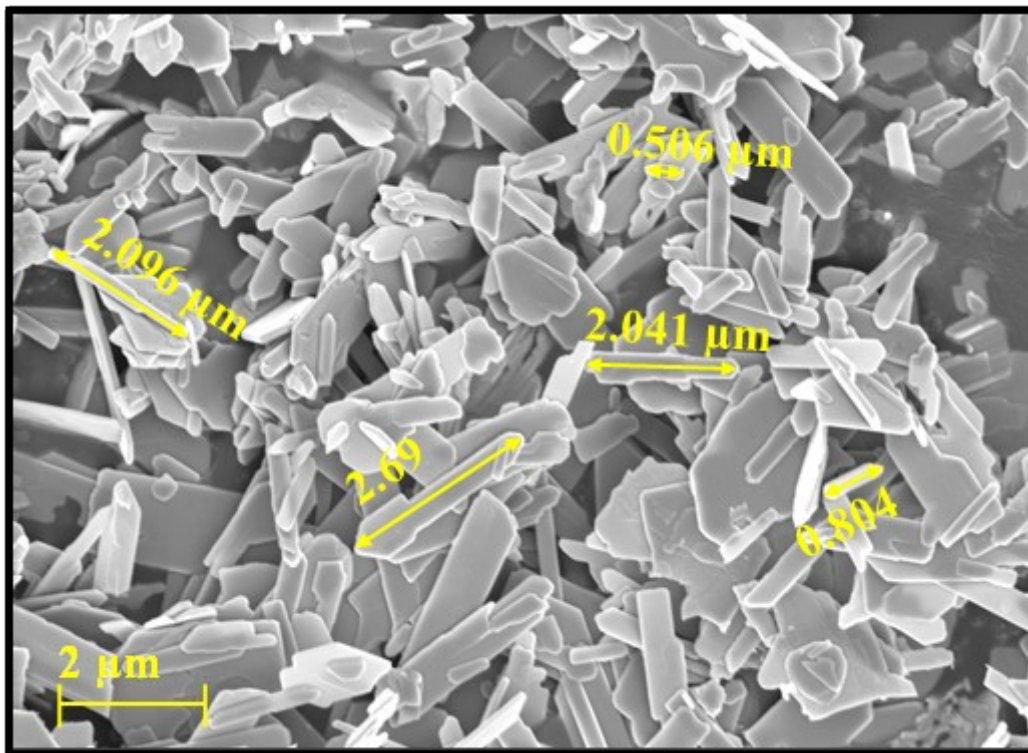

Fig. S3 FEG-SEM images depicting particle size of  $Bi_2MoO_6$ .

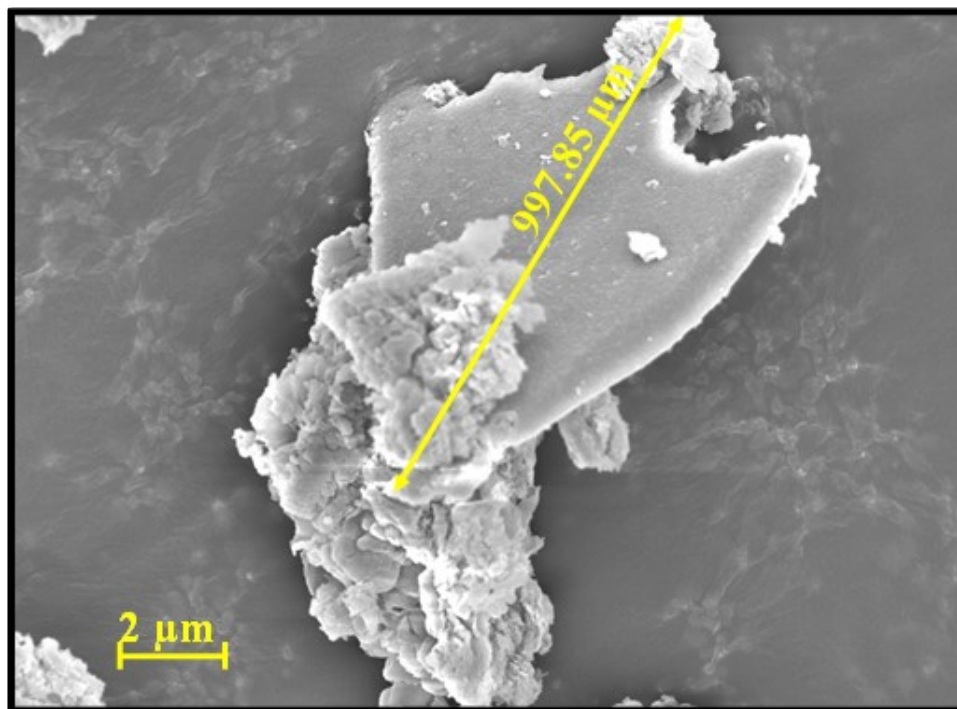

Fig. S4 FEG-SEM images depicting particle size of  $S_x@g-C_3N_{(4-y)}$ .

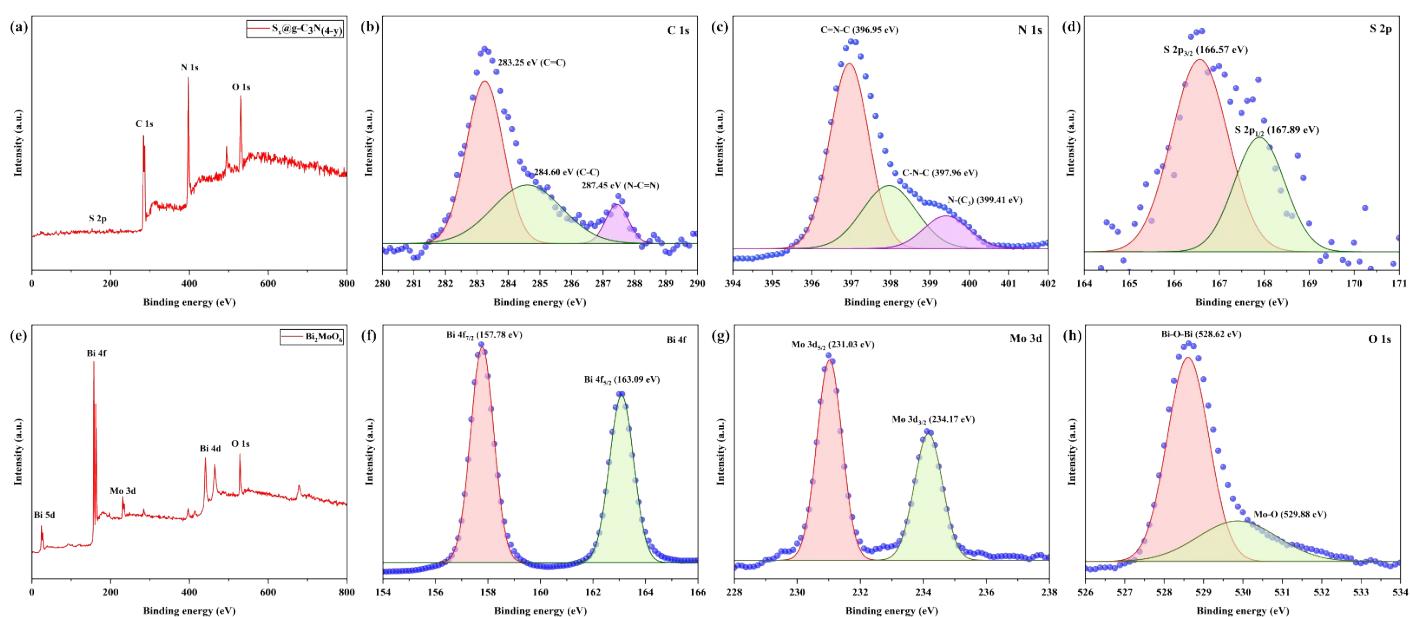

Fig. S5 (a) XPS survey scan of  $S_x@g-C_3N_{(4-y)}$ , high-resolution spectra of (b) C 1s, (c) N 1s, (d) S 2p, (e) XPS survey scan of  $Bi_2MoO_6$ , high-resolution spectra of (f) Bi 4f, (g) Mo 3d, and (h) O 1s.

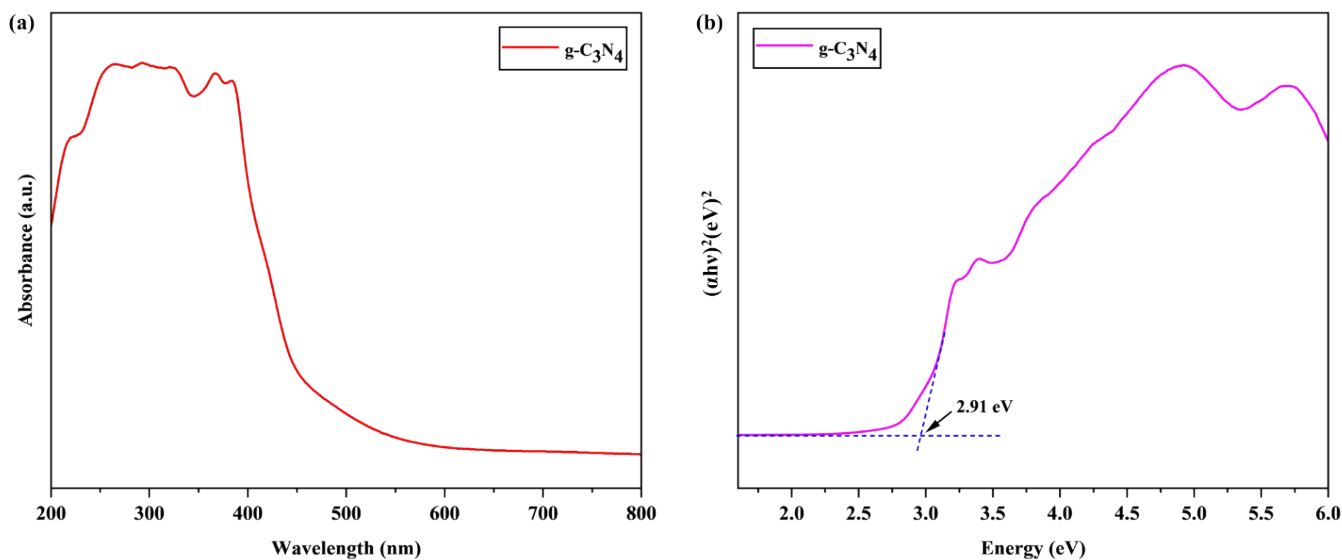

Fig. S6 (a) UV-Vis DRS spectra, and (b) Tauc plot of g-C<sub>3</sub>N<sub>4</sub> synthesized using melamine as briefed in section S2.

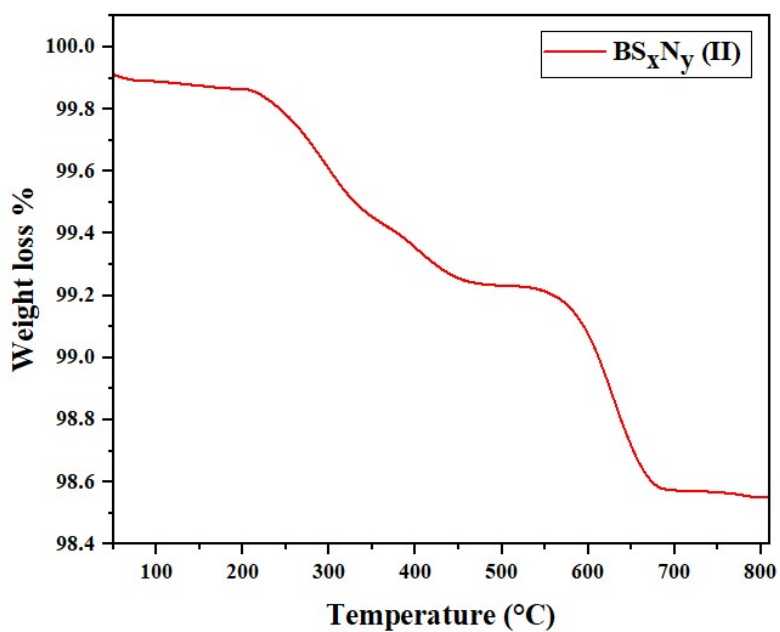

Fig. S7 Thermogravimetric analysis (TGA) curve of BS<sub>x</sub>N<sub>y</sub> (II) composite.

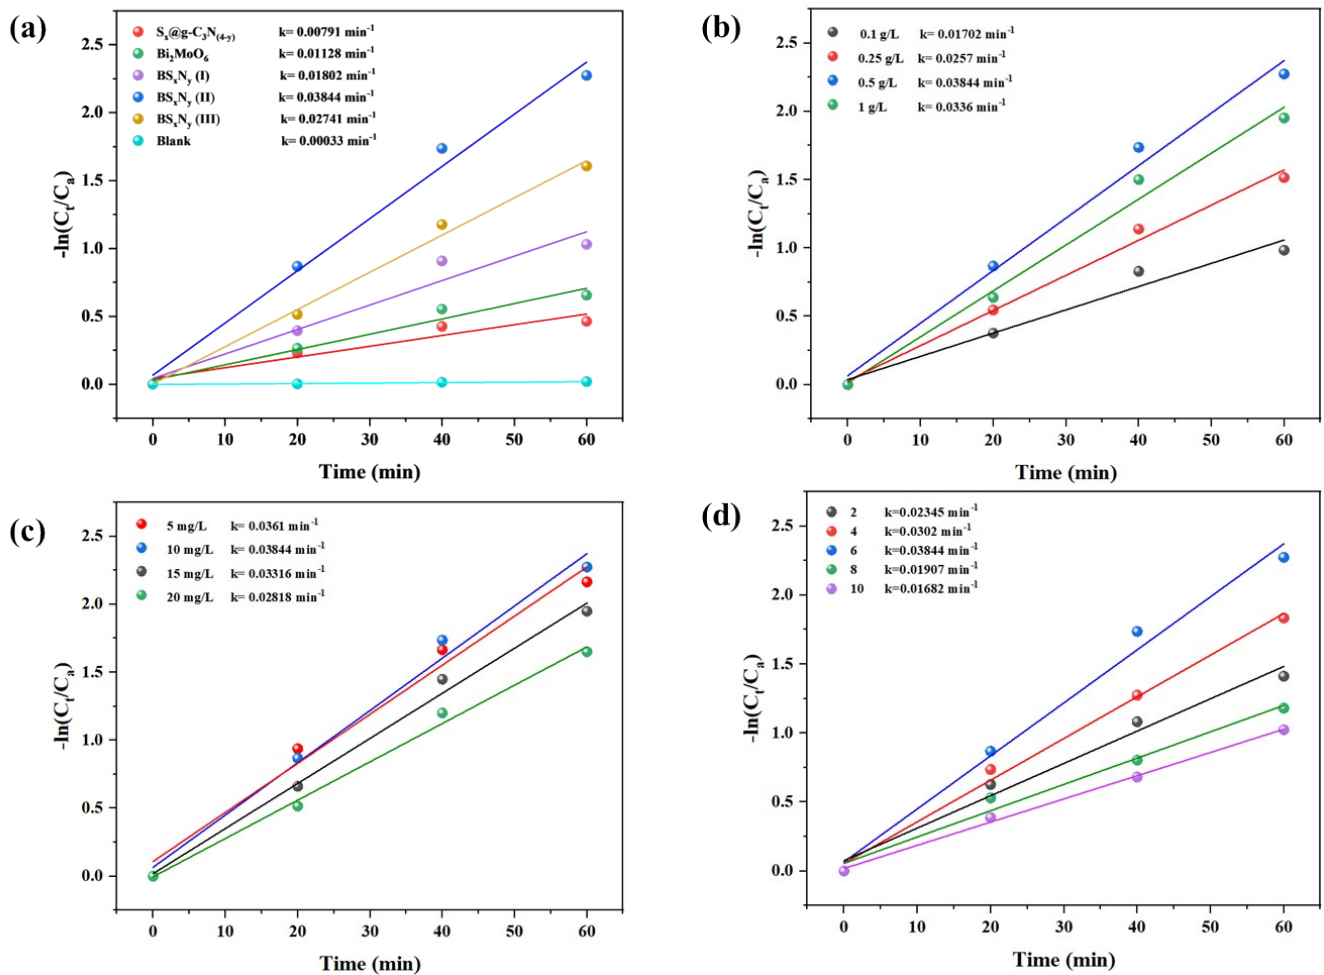

Fig. S8 Pseudo-first-order degradation kinetics plots for tetracycline (TCL) degradation using  $BS_xN_y$ .

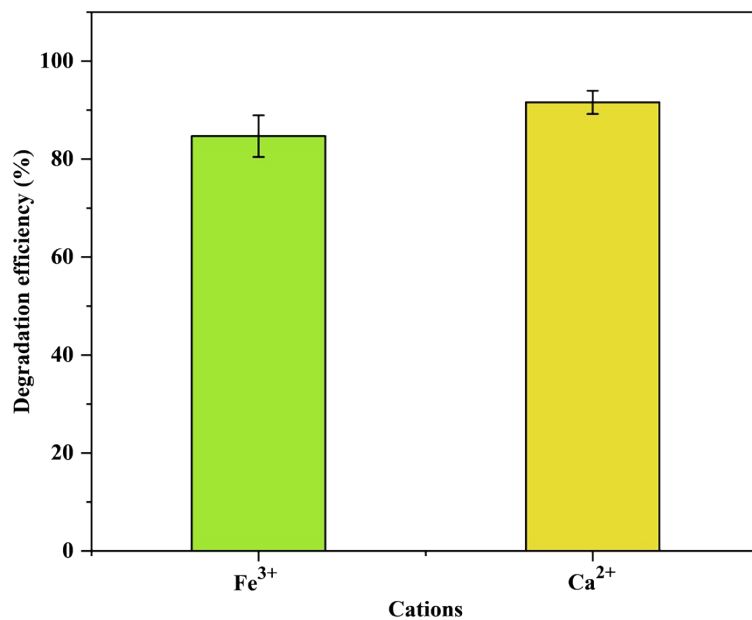

Fig. S9 Influence of cations on the photocatalytic degradation of TCL.

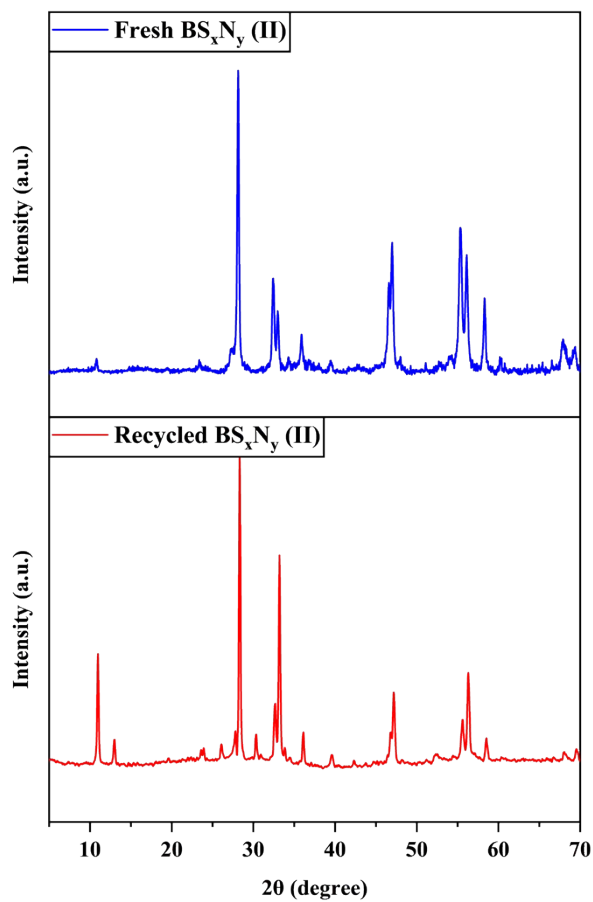

Fig. S10 XRD pattern of (a) fresh BS<sub>x</sub>N<sub>y</sub> (II), and (b) recycled BS<sub>x</sub>N<sub>y</sub> (II).

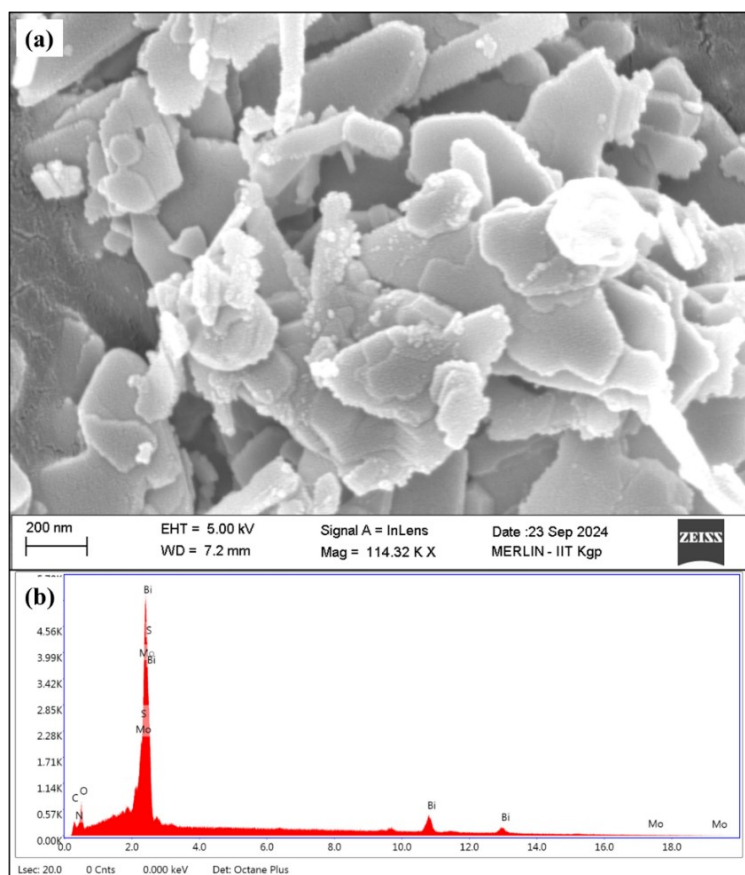

Fig. S11 (a) FEG-SEM image, and (b) EDS spectra of BS<sub>x</sub>N<sub>y</sub> (II) after reusability study.



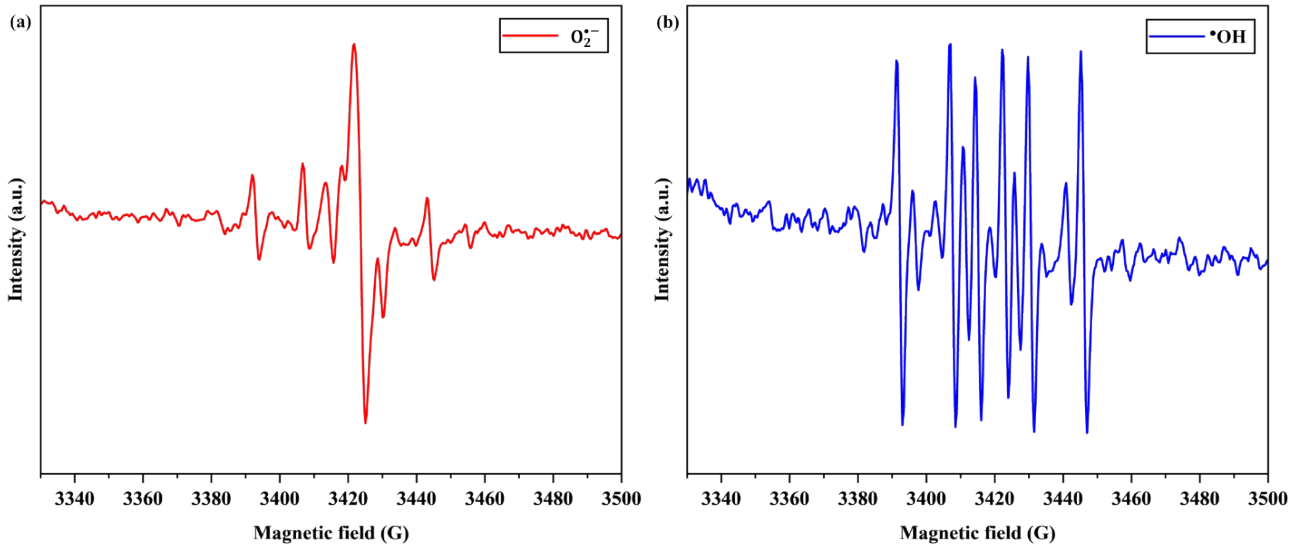

Fig. S12 EPR spectra of (a)  $\text{DMPO-O}_2^-$ , and (b)  $\text{DMPO-OH}$  radicals.

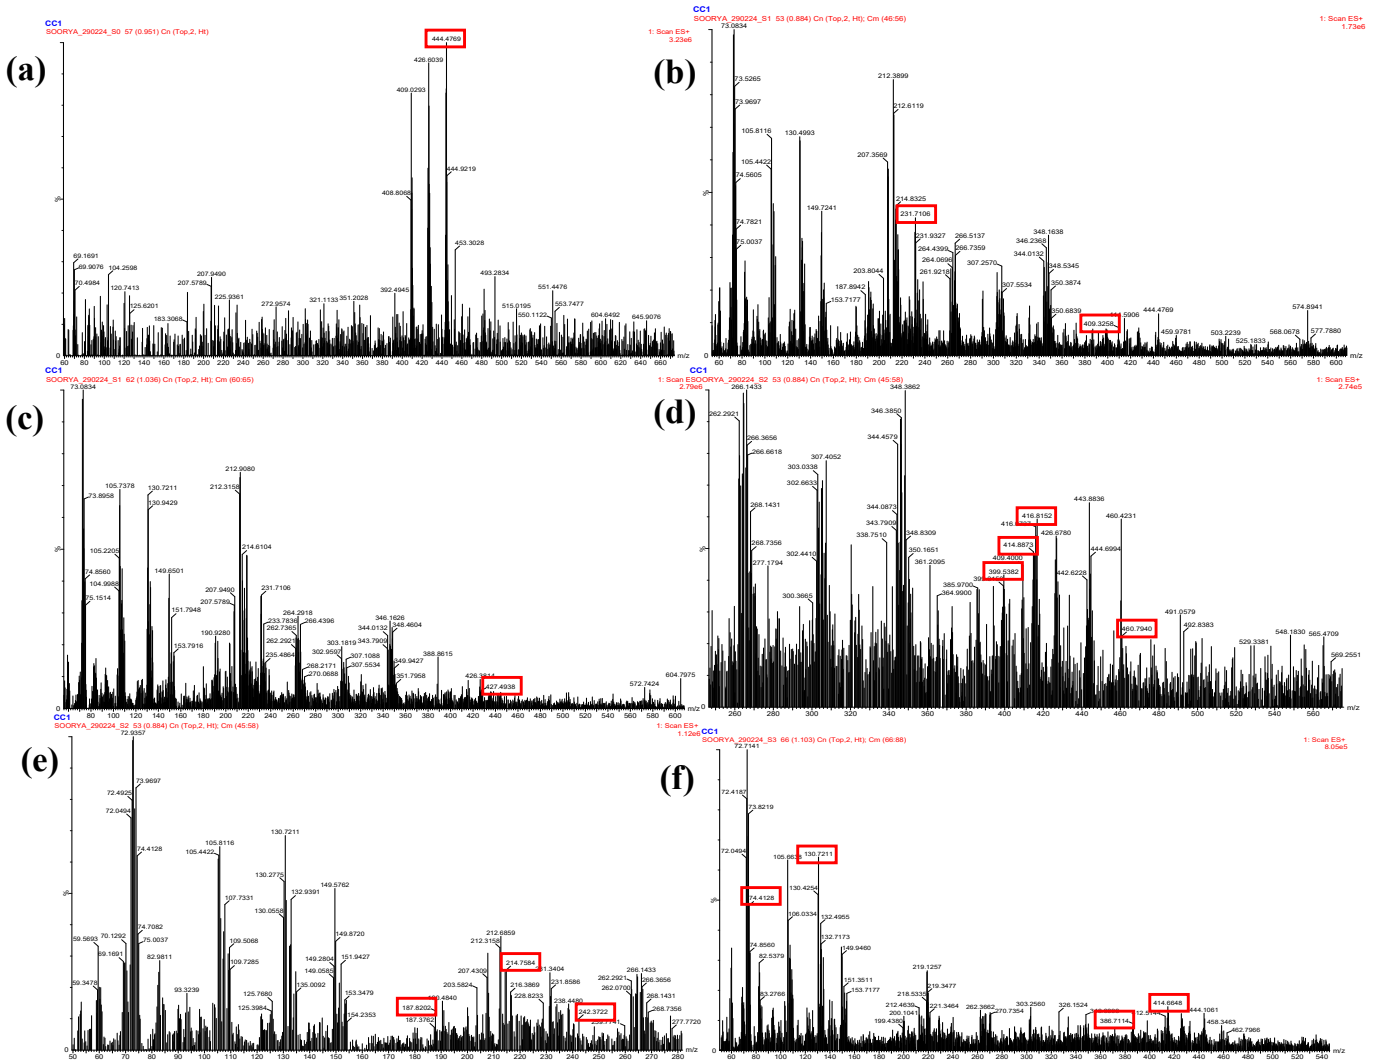

Fig. S13 LC-MS chromatograph displaying identified transformation products (TPs) of TCL.

Table S1 Detailed information on the chemicals used in this work.

| S. No. | Chemical                                                                                                             | Source        |
|--------|----------------------------------------------------------------------------------------------------------------------|---------------|
| 1      | Ammonium molybdate tetrahydrate ((NH <sub>4</sub> ) <sub>6</sub> Mo <sub>7</sub> O <sub>24</sub> ·4H <sub>2</sub> O) | Merck, India  |
| 2      | Bismuth nitrate pentahydrate (Bi(NO <sub>3</sub> ) <sub>3</sub> ·5H <sub>2</sub> O)                                  | Merck, India  |
| 3      | Thiourea (CH <sub>4</sub> N <sub>2</sub> S)                                                                          | Merck, India  |
| 4      | Ethylene glycol (C <sub>2</sub> H <sub>6</sub> O <sub>2</sub> )                                                      | Merck, India  |
| 5      | Ethanol (C <sub>2</sub> H <sub>5</sub> OH)                                                                           | Merck, India  |
| 6      | Tetracycline (C <sub>22</sub> H <sub>24</sub> N <sub>2</sub> O <sub>8</sub> )                                        | Sigma-Aldrich |

Table S2 Instruments used in the characterization and analysis.

| S. No. | Characterization and analysis technique                                                                 | Company                                                        | Purpose                                                                   |
|--------|---------------------------------------------------------------------------------------------------------|----------------------------------------------------------------|---------------------------------------------------------------------------|
| 1      | X-ray diffraction (XRD) analysis                                                                        | D2 Phaser, Bruker, USA                                         | To analyze the crystal structure                                          |
| 2      | Fourier-transform infrared spectroscopy (FTIR)                                                          | Bruker Alpha II                                                | To identify functional groups and chemical composition                    |
| 3      | Field emission gun scanning electron microscopy (FEG-SEM)<br>Energy dispersive X-ray spectroscopy (EDS) | Zeiss Merlin Gemini II, Germany                                | To observe the surface morphology and elemental composition               |
| 4      | Atomic force microscopy (AFM)                                                                           | Agilent 5500 Atomic Force Microscope                           | To characterize surface topography                                        |
| 5      | X-ray Photoelectron Spectroscopy (XPS)                                                                  | PHI 5000 VersaProbe III, ULVAC PHI Inc., USA                   | To analyze surface chemistry                                              |
| 6      | UV-Vis diffuse reflectance spectroscopy                                                                 | Cary 5000 UV-Vis-NIR spectrophotometer                         | To study the optical properties                                           |
| 7      | Inductively coupled plasma optical emission spectroscopy (ICP-OES)                                      | iCAP PRO, Thermo Scientific, USA                               | To determine metal leaching                                               |
| 8      | Thermo-gravimetric and Differential Thermal Analysis (TGA-DTA)                                          | Perkin Elmer Pyris Diamond                                     | To investigate thermal stability and decomposition kinetics               |
| 9      | Liquid chromatography-mass spectrometry (LC-MS)                                                         | Quattro microTM API, Waters, USA                               | To analyze transformation products                                        |
| 10     | Spectrophotometer                                                                                       | Cary 60 UV-Vis Spectrophotometer                               | To measure aliquot concentration                                          |
| 11     | CHNS-O analyzer                                                                                         | Euro EA CHNSO Analyzer                                         | To evaluate the chemical composition                                      |
| 12     | High-resolution transmission electron microscopy (HRTEM)                                                | JEOL (JEM-ARM300F2) (Double Aberration-corrected 300 kV HRTEM) | To perform high-resolution imaging and elemental mapping of the catalyst. |
| 13     | Pulsed Electron paramagnetic resonance (EPR) Spectrometer (X-band)                                      | Bruker (ELEXSYS 580)                                           | To identify active species facilitating photocatalytic degradation.       |

Table S3 CHNS-O analysis of S@g-C<sub>3</sub>N<sub>4</sub> and S<sub>x</sub>@g-C<sub>3</sub>N<sub>(4-y)</sub>.

| Material                                            | C (wt. %) | N (wt. %) | H (wt.%) | S, O (wt.%) |
|-----------------------------------------------------|-----------|-----------|----------|-------------|
| S@g-C <sub>3</sub> N <sub>4</sub>                   | 31.65     | 61.32     | 1.76     | 5.27        |
| S <sub>x</sub> @g-C <sub>3</sub> N <sub>(4-y)</sub> | 31.72     | 59.83     | 1.42     | 7.02        |

Table S4 Binding energy peaks from XPS spectra (Fig. S4), and associated assignments from literature.

| S. No. | Photocatalyst                                       | Element | Binding energy (eV) | Assignments          | References       |       |
|--------|-----------------------------------------------------|---------|---------------------|----------------------|------------------|-------|
| 1      | Bi <sub>2</sub> MoO <sub>6</sub>                    | Bi 4f   | 163.09 eV           | Bi 4f <sub>5/2</sub> | Bi <sup>3+</sup> | 8,9   |
|        |                                                     |         | 157.78 eV           | Bi 4f <sub>7/2</sub> |                  |       |
|        |                                                     | O 1s    | 528.62 eV           | Bi-O-Bi              |                  | 10,11 |
|        |                                                     |         | 529.88 eV           | Mo-O                 |                  |       |
|        |                                                     | Mo 3d   | 231.03 eV           | Mo 3d <sub>5/2</sub> |                  | 12    |
|        |                                                     |         | 234.17 eV           | Mo 3d <sub>3/2</sub> |                  |       |
| 2      | S <sub>x</sub> @g-C <sub>3</sub> N <sub>(4-y)</sub> | C 1s    | 283.15 eV           | C=C                  | 13-15            |       |
|        |                                                     |         | 284.60 eV           | C-C                  |                  |       |
|        |                                                     |         | 287.45 eV           | N-C=N                |                  |       |
|        |                                                     | N 1s    | 396.95 eV           | C-N                  | 16-18            |       |
|        |                                                     |         | 397.96 eV           | C-N=C                |                  |       |
|        |                                                     |         | 399.41 eV           | N-(C <sub>3</sub> )  |                  |       |
|        |                                                     | S 2p    | 166.57 eV           | S 2p <sub>3/2</sub>  |                  | 19    |
|        |                                                     |         | 167.89 eV           | S 2p <sub>1/2</sub>  |                  |       |

Table S5 Pseudo-first order rate constants for photocatalytic degradation of TCL in different reaction conditions.

| Parameters                                     | Reaction Conditions                                 | k (min <sup>-1</sup> ) | R <sup>2</sup> |
|------------------------------------------------|-----------------------------------------------------|------------------------|----------------|
| Photocatalysts                                 | S <sub>x</sub> @g-C <sub>3</sub> N <sub>(4-y)</sub> | 0.00791                | 0.92599        |
|                                                | Bi <sub>2</sub> MoO <sub>6</sub>                    | 0.01128                | 0.96713        |
|                                                | BS <sub>x</sub> N <sub>y</sub> (I)                  | 0.01802                | 0.95375        |
|                                                | BS <sub>x</sub> N <sub>y</sub> (II)                 | 0.03844                | 0.98899        |
|                                                | BS <sub>x</sub> N <sub>y</sub> (III)                | 0.02741                | 0.99402        |
| BS <sub>x</sub> N <sub>y</sub> (II) dose (g/L) | 0.1 g/L                                             | 0.01702                | 0.96792        |
|                                                | 0.25 g/L                                            | 0.0257                 | 0.99208        |
|                                                | 0.5 g/L                                             | 0.03844                | 0.98899        |
|                                                | 1 g/L                                               | 0.0336                 | 0.98736        |
| Initial TCL concentration (mg/L)               | 5 mg/L                                              | 0.0361                 | 0.98194        |
|                                                | 10 mg/L                                             | 0.03844                | 0.98899        |

|    |         |         |         |
|----|---------|---------|---------|
|    | 15 mg/L | 0.03316 | 0.9932  |
|    | 20 mg/L | 0.02818 | 0.99132 |
| pH | 2       | 0.02345 | 0.98028 |
|    | 4       | 0.0302  | 0.99451 |
|    | 6       | 0.03844 | 0.98899 |
|    | 8       | 0.01907 | 0.98341 |
|    | 10      | 0.01682 | 0.99735 |

Table S6 Comparison of photocatalytic performance of Bi<sub>2</sub>MoO<sub>6</sub> and g-C<sub>3</sub>N<sub>4</sub> based catalysts for TCL degradation.

| Photocatalyst                                                                                          | Light source                | Initial TCL concentration | Catalyst dosage | pH       | Degradation efficiency | Mechanism      | References        |
|--------------------------------------------------------------------------------------------------------|-----------------------------|---------------------------|-----------------|----------|------------------------|----------------|-------------------|
| 10%-CuBi <sub>2</sub> O <sub>4</sub> /Bi <sub>2</sub> MoO <sub>6</sub>                                 | 300 W xenon lamp            | 20 mg/L                   | 0.3 g/L         | -        | 72.8% (60 min)         | Type II        | 20                |
| SnS <sub>2</sub> /Bi <sub>2</sub> MoO <sub>6-x</sub>                                                   | 300 W xenon lamp            | 20 mg/L                   | 0.3 g/L         | 6        | 89% (90 min)           | Z-Scheme       | 21                |
| 15% g-C <sub>3</sub> N <sub>4</sub> /Bi <sub>2</sub> MoO <sub>6</sub> /Bi <sub>2</sub> WO <sub>6</sub> | 500 W tungsten halogen lamp | 30 mg/L                   | 0.25 g/L        | -        | 98% (90 min)           | Z-Scheme       | 22                |
| Bi <sub>2</sub> MoO <sub>6</sub> /g-C <sub>3</sub> N <sub>4</sub>                                      | 300 W xenon lamp            | 10 mg/L                   | 1 g/L           | 5        | 97.5% (120 min)        | Type II        | 23                |
| BiOCl/Bi <sub>2</sub> MoO <sub>6</sub>                                                                 | 350 W xenon lamp            | 10 mg/L                   | 1 g/L           | 7        | 97.23% (100 min)       | Type II        | 24                |
| ZrO <sub>2</sub> modified S-doped g-C <sub>3</sub> N <sub>4</sub>                                      | 300 W xenon lamp            | 40 mg/L                   | 0.6 g/L         | 8.5      | 72.2% (150 min)        | Type II        | 25                |
| N defect engineered g-C <sub>3</sub> N <sub>4</sub>                                                    | 50 W LED lamp               | 20 mg/L                   | 1 g/L           | 4.7      | 78% (120 min)          | -              | 26                |
| BS <sub>x</sub> N <sub>y</sub> (II)                                                                    | <b>50 W LED lamp</b>        | <b>10 mg/L</b>            | <b>0.5 g/L</b>  | <b>6</b> | <b>92.4% (60 min)</b>  | <b>Type II</b> | <b>This study</b> |

Table S7 Water quality parameters for different water matrices.

| Parameters                        | DI water | Tap water | Municipal wastewater |
|-----------------------------------|----------|-----------|----------------------|
| pH                                | 6.7±0.2  | 7.1±0.3   | 6.9±0.2              |
| Turbidity (NTU)                   | -        | 2.1±0.8   | 52.8±3.1             |
| TSS (mg/L)                        | -        | -         | 352±8                |
| Chloride (Cl <sup>-</sup> , mg/L) | -        | 0.7±1.9   | 39.4±5.4             |

|                                 |             |             |                                  |
|---------------------------------|-------------|-------------|----------------------------------|
| Bicarbonate ( $HCO_3^-$ , mg/L) | -           | 18.4±3.5    | 102.4±3.5                        |
| Sulfate ( $SO_4^{2-}$ , mg/L)   | -           | 1.6±0.8     | 28.3±4.7                         |
| Nitrate ( $NO_3^-$ , mg/L)      | -           | -           | 49±0.8                           |
| Phosphate ( $PO_4^{3-}$ , mg/L) | -           | -           | 22.6±0.4                         |
| COD (mg/L)                      | -           | -           | 166±13 (spiked with 10 mg/L TCL) |
| TCL (mg/L)                      | 10 (spiked) | 10 (spiked) | 10 (spiked)                      |

Table S8 Transformation products (TPs) of TCL identified from LC-MS (Source: Fig. S13).

| Parent compound/TPs | m/z    | Structure |
|---------------------|--------|-----------|
| TCL                 | 444.47 |           |
| TP1                 | 231.71 |           |
| TP2                 | 214.75 |           |
| TP3                 | 130.72 |           |

|     |        |                                                                                      |
|-----|--------|--------------------------------------------------------------------------------------|
| TP4 | 74.41  | 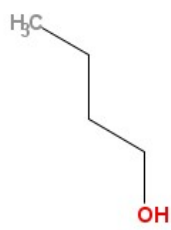   |
| TP5 | 409.32 |    |
| TP6 | 242.37 |    |
| TP7 | 187.82 |   |
| TP8 | 460.79 |  |
| TP9 | 416.81 |  |

|      |        |                                                                                      |
|------|--------|--------------------------------------------------------------------------------------|
| TP10 | 414.66 | 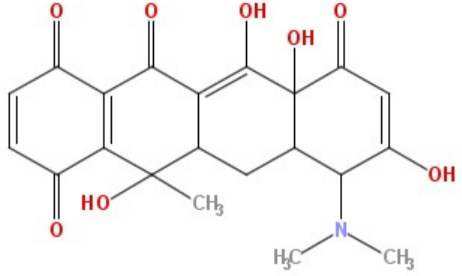   |
| TP11 | 427.49 |    |
| TP12 | 414.88 |    |
| TP13 | 399.53 |  |
| TP14 | 386.71 |  |

## REFERENCES

- 1 M. Waqar, M. Imran, S. F. Adil, S. Noreen, S. Latif, M. Khan and M. R. H. Siddiqui, *Materials*, 2019, **13**, 35.
- 2 E. Vesali-Kermani, A. Habibi-Yangjeh, H. Diarmand-Khalilabad and S. Ghosh, *Journal of Colloid and Interface Science*, 2020, **563**, 81–91.
- 3 S. Vinoth, K. Subramani, W.-J. Ong, M. Sathish and A. Pandikumar, *Journal of Colloid and Interface Science*, 2021, **584**, 204–215.
- 4 S. R. Mishra, V. Gadore and M. Ahmaruzzaman, *International Journal of Environmental Analytical Chemistry*, 2023, 1–18.
- 5 D. Luo, P. Zhu, M. Duan, M. Liu, H. Lu and Z. Huang, *Separation and Purification Technology*, 2023, **311**, 123287.
- 6 S. Li, Y. He, F. Kong, W. Sun and J. Hu, *Water*, 2020, **12**, 2078.
- 7 J. F. Leal, V. I. Esteves and E. B. H. Santos, *Journal of Photochemistry and Photobiology A: Chemistry*, 2019, **372**, 218–225.
- 8 N. A. M. Saeed, E. Coetsee, R. E. Kroon, M. Bettinelli and H. C. Swart, *Optical Materials*, 2021, **119**, 111291.
- 9 P. Xiao, C. Shen, Y. Li, S. Cui, S. Chen and J. Yang, *Journal of the Taiwan Institute of Chemical Engineers*, 2024, **162**, 105611.
- 10 C. Pan, Z. Wang, Y. Lou, Y. Zhang, Y. Dong and Y. Zhu, *Journal of Materials Chemistry A*, 2021, **9**, 3616–3627.
- 11 Z. Yang, Q. Lin, G. Zeng, S. Zhao, G. Yan, M. B. M. Y. Ang, Y.-H. Chiao and S. Pu, *Journal of Membrane Science*, 2023, **669**, 121329.
- 12 M. Lathika Divya, Y.-S. Lee and V. Aravindan, *Physical Review Applied*, 2023, **19**, 034016.
- 13 V. Hasija, P. Singh, S. Thakur, V.-H. Nguyen, Q. Van Le, T. Ahamad, S. M. Alshehri, P. Raizada, B. M. Matsagar and K. C.-W. Wu, *Chemosphere*, 2023, **320**, 138015.
- 14 P. Ke, D. Zeng, J. Cui, X. Li and Y. Chen, *Catalysts*, 2022, **12**, 247.
- 15 E. Arulkumar and S. Thanikaikarasan, *Diamond and Related Materials*, 2024, **147**, 111294.
- 16 M. Momina and K. Ahmad, *International Journal of Biological Macromolecules*, 2024, **263**, 130253.
- 17 C. Wang, C. Yang, J. Qin, S. Rajendran and X. Zhang, *Materials Chemistry and Physics*, 2022, **275**, 125299.
- 18 Z. Zhao, X. Wang, Z. Shu, J. Zhou, T. Li, W. Wang and Y. Tan, *Applied Surface Science*, 2018, **455**, 591–598.
- 19 M. A. Cotarelo, F. Huerta, C. Quijada, J. M. Pérez, M. A. del Valle and J. L. Vázquez, *Journal of The Electrochemical Society*, 2006, **153**, A2071.
- 20 W. Shi, M. Li, X. Huang, H. Ren, F. Guo, Y. Tang and C. Lu, *Chemical Engineering Journal*, 2020, **394**, 125009.
- 21 X. Zou, B. Sun, L. Wang, H. Bai, X. Meng, C. Li and Z. Li, *Chemical Engineering Journal*, 2024, **482**, 148818.
- 22 H. Sun, C. Zou and W. Tang, *Colloids and Surfaces A: Physicochemical and Engineering Aspects*, 2022, **654**, 130105.



- 23 S. Wu, B. Yi and D. Lan, *Journal of Photochemistry and Photobiology A: Chemistry*, 2023, **444**, 115013.
- 24 Y. Qiu, J. Lu, Y. Yan, J. Niu and Y. Duan, *Surfaces and Interfaces*, 2022, **31**, 102009.
- 25 A. M. Asiri, A. Raza, M. K. Shahzad, M. M. Fadhali, S. B. Khan, K. A. Alamry, S. Y. Alfifi and H. M. Marwani, *Journal of Photochemistry and Photobiology A: Chemistry*, 2023, **438**, 114486.
- 26 U. Ghosh, A. Majumdar and A. Pal, *Materials Research Bulletin*, 2021, **133**, 111074.
